# Supplementary material for: Social stress increases plasma cortisol and reduces forebrain cell proliferation in subordinate male zebrafish (Danio rerio)
Source: Oxford University Press journal article supplement (doi:10.1242/jeb.194894), 2018-01-01
Supplement: jeb194894supp.pdf [file jeb194894supp.pdf]

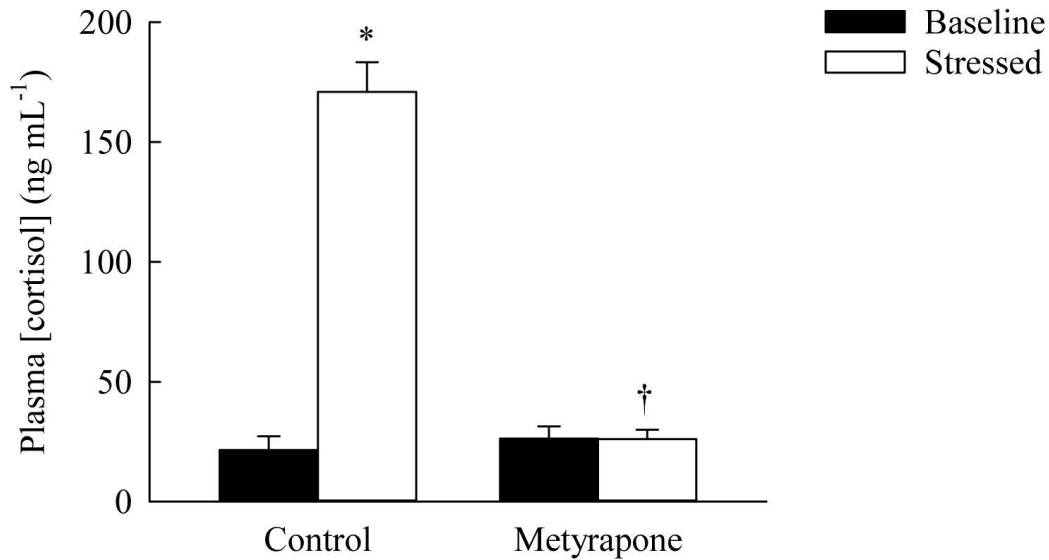

**Figure S1.** Plasma cortisol concentrations in untreated (control) and metyrapone-treated male zebrafish sampled directly from the holding tank (baseline; black bars) or subjected to the standardized netting stressor of Ramsay et al. (2009) (white bars). Values are means  $\pm$  SEM, with  $N = 11$  control fish, and  $N = 6$  metyrapone-exposed fish. An asterisk indicates a significant effect of stress on plasma cortisol within a given treatment; a dagger indicates a significant effect of treatment on plasma cortisol within a stress level (2-way ANOVA,  $P < 0.001$  for the effect of metyrapone treatment,  $P < 0.001$  for the effect of stressor exposure, and  $P < 0.001$  for the interaction of metyrapone treatment and stress exposure).
